# Supplementary material
Source: Springer Nature journal article supplement (https://www.springermedizin.de/resource/supplementary/12881_2010_657_MOESM3_ESM.pdf/9451158)

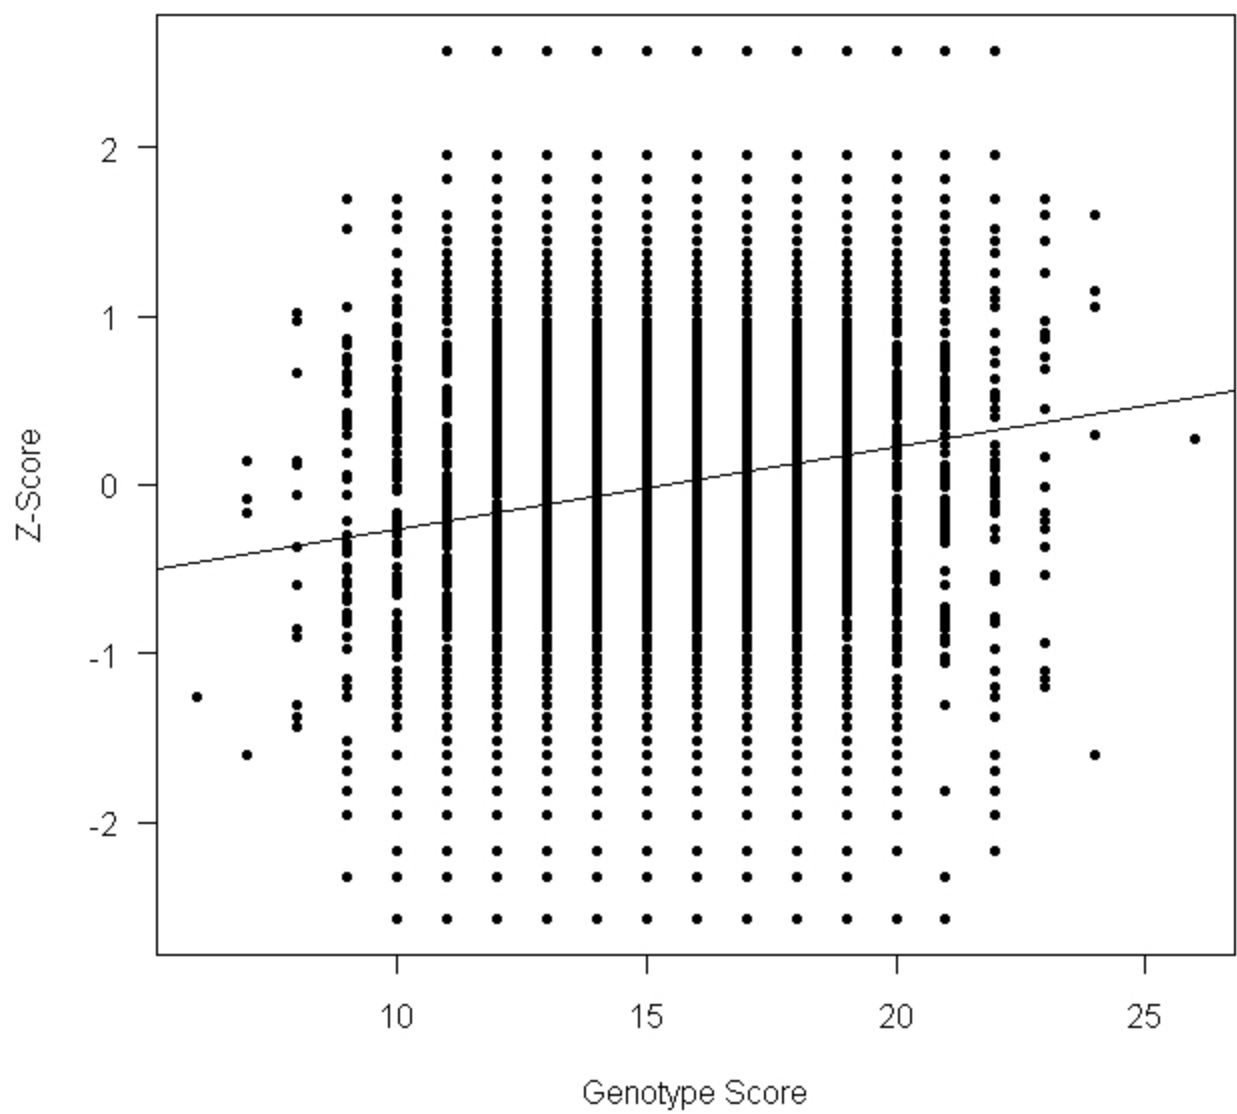

Supplement: MOESM3 [file 9451158]
